# Supplementary material for: A highly efficient potassium-treated Au–Cu/Al2O3catalyst for the preferential oxidation of carbon monoxide
Source: Royal Society of Chemistry journal article supplement (doi:10.1039/c5ra21119k), 2016-01-01
Supplement: c5ra21119k1.pdf [file c5ra21119k1.pdf]

## Supporting Information

### **A highly efficient potassium treated Au-Cu/Al<sub>2</sub>O<sub>3</sub> catalyst for the preferential oxidation of carbon monoxide**

Yu-Xin Miao, Lei Shi, Qiang Sun and Wen-Cui Li\*

State Key Laboratory of Fine Chemicals, School of Chemical Engineering, Dalian  
University of Technology, Dalian 116024, P. R. China

\* Corresponding author: + 86-411-84986355, E-mail: wencuili@dlut.edu.cn

## Supporting figures

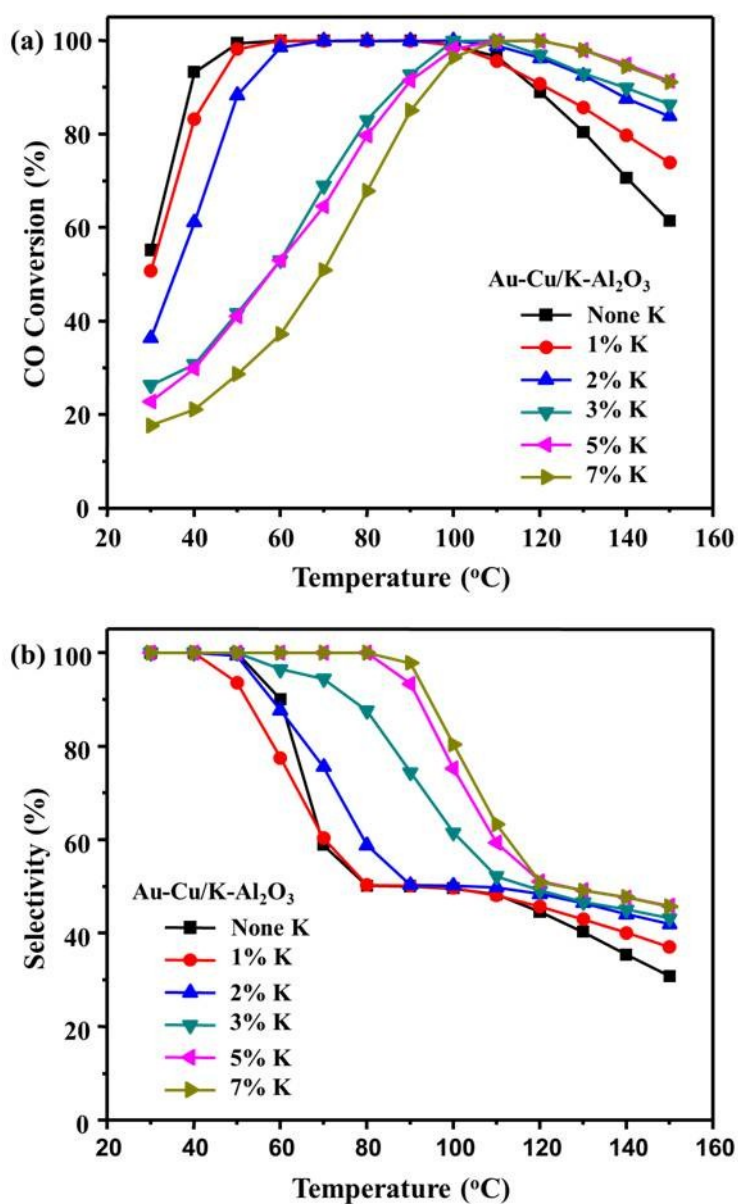

Fig. S1 (a) Conversion and (b) selectivity as a function of the reaction temperature for CO-PROX over Au-Cu/K-Al<sub>2</sub>O<sub>3</sub> catalysts with different K loadings. Reaction conditions: 1 vol.% CO + 1 vol.% O<sub>2</sub> + 40 vol.% H<sub>2</sub> and balance N<sub>2</sub>. Weight hourly space velocity (WHSV) = 40,000 mL/h·g<sub>cat</sub>.
